# Supplementary material for: Public involvement in the Swedish health system: citizen dialogues with unclear outcomes
Source: Springer Nature journal article supplement (doi:10.1186/s12913-023-09947-x), 2023-09-04
Supplement: MOESM1 [file 26003008]

## Supplementary file 1. Characteristics of the citizen dialogues (CDs)

| Region Year      | Type of material                   | Topic                            | Represented groups                                   | Type of dialogue                                                                                           | When in decision-process?                                                                      | Purpose                                                               | Level of participation | Description of how results will be used |
|------------------|------------------------------------|----------------------------------|------------------------------------------------------|------------------------------------------------------------------------------------------------------------|------------------------------------------------------------------------------------------------|-----------------------------------------------------------------------|------------------------|-----------------------------------------|
| 1. Region A 2016 | Concluding report from several CDs | Healthcare in general            | Young, mid-life, elderly                             | 24 discussion groups                                                                                       | When initiatives and ideas are raised.<br>When investigations prior to decisions are conducted | Gather citizens opinions, use opinions as a basis for decision making | Dialogue               | Yes                                     |
| 2. Region A 2018 | Concluding report from several CDs | Mental health                    | Young, young adults, staff working with young people | No description of activity, but 287 individuals participated in 63 dialogue group meetings                 | When initiatives and ideas are raised<br>When investigations prior to decisions are conducted  | Gather citizens opinions, use opinions as a basis for decision making | Dialogue               | Yes                                     |
| 3. Region B 2017 | Concluding report from several CDs | Health promotion                 | General public                                       | 8 focus group conversations                                                                                | When initiatives and ideas are raised                                                          | Gather citizens opinions, use opinions as a basis for decision making | Dialogue               | No                                      |
| 4. Region B 2016 | Concluding report from several CDs | Equal care                       | Low socio-economic status, parents                   | No description of number, but of activities: individual interviews, quick interviews and a reference group | When initiatives and ideas are raised                                                          | Gather citizens opinions, use opinions as a basis for decision making | Dialogue               | Yes                                     |
| 5. Region B 2015 | Concluding report from several CDs | Primary care                     | General public                                       | 8 focus group conversations                                                                                | When initiatives and ideas are raised<br>When investigations prior to decisions are conducted  | Gather citizens opinions, use opinions as a basis for decision making | Dialogue               | Yes                                     |
| 6. Region B 2015 | Concluding report from several CDs | Equal care                       | Low socio-economic status, parents                   | 9 interviews individually or in group, 28 quick interviews                                                 | When initiatives and ideas are raised                                                          | Gather citizens opinions                                              | Consultation           | No                                      |
| 7. Region B 2014 | Concluding report from several CDs | E-health, communication channels | General public                                       | 12 focus groups at directed visits                                                                         | When initiatives and ideas are raised                                                          | Gather citizens opinions                                              | Dialogue               | Yes                                     |

|                      |                                                            |                                                         |                                                             |                                                                      |                                                                             |                                                                                                                                    |                          |     |
|----------------------|------------------------------------------------------------|---------------------------------------------------------|-------------------------------------------------------------|----------------------------------------------------------------------|-----------------------------------------------------------------------------|------------------------------------------------------------------------------------------------------------------------------------|--------------------------|-----|
| 8. Region C<br>2018  | Concluding report<br>from one CD                           | Healthcare with<br>a focus on<br>cooperation            | General public                                              | 1 discussion group                                                   | When initiatives<br>and ideas are raised<br>When decisions are<br>evaluated | Gather citizens opinions,<br>use opinions as a basis for<br>decision making                                                        | Dialogue                 | No  |
| 9. Region C<br>2013  | Concluding report<br>from several CDs                      | Healthcare in<br>general                                | General public                                              | 28 discussion<br>groups                                              | When initiatives<br>and ideas are raised                                    | Gather citizens opinions,<br>use opinions as a basis for<br>decision making, inform<br>and achieve knowledge<br>among participants | Influence<br>Dialogue    | Yes |
| 10. Region C<br>2019 | Concluding power<br>point presentation<br>from several CDs | E-health,<br>contact with the<br>health care<br>service | Older, newly<br>arrived (from<br>other countries),<br>young | 3 group<br>conversations, 4<br>deep interviews, 4<br>directed visits | When initiatives<br>and ideas are raised                                    | Gather citizens opinions                                                                                                           | Dialogue                 | No  |
| 11. Region D<br>2016 | Short summarized<br>information from<br>one CD             | Healthcare in<br>general                                | Newly arrived<br>(from other<br>countries)                  | 1 directed visit with<br>discussion in groups                        | -                                                                           | Gather citizens opinions,<br>make citizens aware of the<br>policy, inform and achieve<br>knowledge among<br>participants           | Dialogue<br>Consultation | No  |
| 12. Region D<br>2016 | Short summarized<br>information from<br>one CD             | Child care                                              | Parents, staff<br>working with<br>child care                | 1 directed visit with<br>group discussion                            | When decisions are<br>evaluated                                             | -                                                                                                                                  | -                        | No  |
| 13. Region D<br>2016 | Short summarized<br>information from<br>one CD             | Child care                                              | Parents                                                     | 1 directed visit with<br>group discussion                            | When decisions are<br>evaluated                                             | -                                                                                                                                  | -                        | No  |
| 14. Region D<br>2016 | Short summarized<br>information from<br>one CD             | Healthcare in<br>general                                | General public                                              | 1 discussion group                                                   | -                                                                           | -                                                                                                                                  | -                        | No  |
| 15. Region D<br>2015 | Short summarized<br>information from<br>one CD             | Healthcare in<br>general                                | General public                                              | 1 directed visit to an<br>event                                      | -                                                                           | Make citizens aware of the<br>policy, inform and achieve<br>knowledge among<br>participants                                        | -                        | No  |
| 16. Region D<br>2015 | Short summarized<br>information from<br>one CD             | Healthcare in<br>general                                | General public                                              | 1 directed visit to an<br>event                                      | -                                                                           | Make citizens aware of the<br>policy, inform and achieve<br>knowledge among<br>participants                                        | -                        | No  |
| 17. Region D<br>2016 | Short summarized<br>information from<br>one CD             | Communication<br>channels                               | Young people<br>with disability and<br>mental illness       | -                                                                    | When initiatives<br>and ideas are raised                                    | -                                                                                                                                  | -                        | No  |
| 18. Region D<br>2016 | Short summarized<br>information from<br>one CD             | Communication<br>channels                               | Older people                                                | 1 discussion group                                                   | When initiatives<br>and ideas are raised                                    | -                                                                                                                                  | -                        | No  |
| 19. Region D<br>2015 | Short summarized<br>information from<br>one CD             | Healthcare in<br>general                                | Young people                                                | -                                                                    | When initiatives<br>and ideas are raised                                    | Gather citizens opinions,<br>achieve legitimacy for the<br>decision-making process                                                 | -                        | No  |

|                   |                                               |                                     |                                                |                                          |                                       |                                                                                                                           |              |     |
|-------------------|-----------------------------------------------|-------------------------------------|------------------------------------------------|------------------------------------------|---------------------------------------|---------------------------------------------------------------------------------------------------------------------------|--------------|-----|
| 20. Region D 2019 | Short summarized information from several CDs | Illness among young people          | Families, ill young people                     | 3 round-table meetings                   | When initiatives and ideas are raised | Gather citizens opinions, use opinions as a basis for decision making                                                     | Dialogue     | Yes |
| 21. Region D 2018 | Short summarized information from several CDs | Coordination in healthcare          | Parents                                        | 4 directed visits to a service provider  | When initiatives and ideas are raised | Gather citizens opinions                                                                                                  | Consultation | No  |
| 22. Region D 2018 | Short summarized information from one CD      | Coordination in next of kin care    | Next of kin carers                             | 1 group conversation                     | When initiatives and ideas are raised | Gather citizens opinions                                                                                                  | Dialogue     | Yes |
| 23. Region D 2016 | Short summarized information from one CD      | Mental health among young people    | Young people, parents                          | 1 directed visit to an event             | When initiatives and ideas are raised | Gather citizens opinions, use opinions as a basis for decision making, achieve legitimacy for the decision-making process | Consultation | Yes |
| 24. Region D 2016 | Short summarized information from several CDs | Mental health among young people    | Young, staff working with young people         | 2 directed visits with group discussions | When initiatives and ideas are raised | Gather citizens opinions, use opinions as a basis for decision making, achieve legitimacy for the decision-making process | Consultation | Yes |
| 25. Region D 2016 | Short summarized information from one CD      | Emergency care, wrong level of care | Citizens seeking emergency care, family, staff | 1 directed visit to a service provider   | When initiatives and ideas are raised | Gather citizens opinions, use opinions as a basis for decision making, achieve legitimacy for the decision-making process | Consultation | Yes |

- means that there is no information or not enough information to classify the CD.
